# Supplementary material
Source: bioRxiv or medRxiv preprint supplement (https://www.biorxiv.org/content/biorxiv/early/2021/10/07/2021.10.06.463318/DC1/embed/media-1.pdf)

## Supplemental Material

### Tables

Table 1

| Gene          | Gated | Pos/Neg | Inferred? | Ref |
|---------------|-------|---------|-----------|-----|
| <i>acr-2</i>  | ACh   | P       |           | 1   |
| <i>acr-3</i>  | ACh   | P       |           | 1   |
| <i>acr-6</i>  | ACh   | P       | yes       |     |
| <i>acr-7</i>  | ACh   | P       | yes       |     |
| <i>acr-8</i>  | ACh   | P       | yes       |     |
| <i>acr-9</i>  | ACh   | P       | yes       |     |
| <i>acr-10</i> | ACh   | P       | yes       |     |
| <i>acr-11</i> | ACh   | P       | yes       |     |
| <i>acr-12</i> | ACh   | P       |           | 2   |
| <i>lev-8</i>  | ACh   | P       |           | 3   |
| <i>acr-14</i> | ACh   | P       | yes       |     |
| <i>acr-15</i> | ACh   | P       | yes       |     |
| <i>acr-16</i> | ACh   | P       |           | 4   |
| <i>acr-19</i> | ACh   | P       | yes       |     |
| <i>acr-25</i> | ACh   | P       | yes       |     |
| <i>eat-2</i>  | ACh   | P       |           | 5   |
| <i>lev-1</i>  | ACh   | P       |           | 6   |
| <i>unc-29</i> | ACh   | P       |           | 6   |
| <i>unc-38</i> | ACh   | P       |           | 6   |
| <i>unc-63</i> | ACh   | P       |           | 7   |
| <i>unc-49</i> | GABA  | N       |           | 8   |
| <i>exp-1</i>  | GABA  | P       |           | 9   |
| <i>lgc-35</i> | GABA  | P       |           | 10  |
| <i>lgc-36</i> | GABA  | P       | yes       |     |
| <i>lgc-37</i> | GABA  | N       | yes       |     |
| <i>lgc-38</i> | GABA  | N       | yes       |     |
| <i>avr-14</i> | Glu   | N       |           | 11  |
| <i>avr-15</i> | Glu   | N       |           | 11  |
| <i>glc-1</i>  | Glu   | N       |           | 12  |
| <i>glc-2</i>  | Glu   | N       |           | 13  |
| <i>glc-3</i>  | Glu   | N       |           | 14  |
| <i>glc-4</i>  | Glu   | N       | yes       |     |
| <i>acc-2</i>  | ACh   | N       |           | 15  |
| <i>acc-3</i>  | ACh   | N       |           | 15  |
| <i>acc-4</i>  | ACh   | P       | yes       |     |

|                     |                              |   |     |            |
|---------------------|------------------------------|---|-----|------------|
| <i>lgc-46</i>       | ACh                          | N |     | 16         |
| <i>lgc-47</i>       | ACh                          | N | yes |            |
| <i>lgc-48</i>       | ACh                          | P | yes |            |
| <i>lgc-49</i>       | ACh                          | N |     | This study |
| <i>ggr-1/lgc-57</i> | choline, ACh                 | N |     | This study |
| <i>ggr-2/lgc-58</i> | choline, ACh                 | N |     | This study |
| <i>lgc-39</i>       | ACh, tyramine,<br>octopamine | N |     | This study |
| <i>lgc-40</i>       | choline, ACh                 | N |     | This study |
| <i>gab-1</i>        | GABA                         | N |     | 17         |
| <i>acc-1</i>        | ACh                          | N |     | 15         |
| <i>nmr-1</i>        | Glu                          | P |     | 18         |
| <i>nmr-2</i>        | Glu                          | P |     | 19         |
| <i>glr-1</i>        | Glu                          | P |     | 20         |
| <i>glr-2</i>        | Glu                          | P |     | 20         |
| <i>glr-3</i>        | Glu                          | P | Yes |            |
| <i>glr-4</i>        | Glu                          | P | Yes |            |
| <i>glr-5</i>        | Glu                          | P |     | 21         |
| <i>glr-6</i>        | Glu                          | P | yes |            |
| <i>glr-7</i>        | Glu                          | P | yes |            |
| <i>glr-8</i>        | Glu                          | P | yes |            |

1. Jospin, M. *et al.* A neuronal acetylcholine receptor regulates the balance of muscle excitation and inhibition in *Caenorhabditis elegans*. *PLoS Biol.* **7**, (2009).
2. Petrash, H. A., Philbrook, A., Haburcak, M., Barbagallo, B. & Francis, M. M. ACR-12 ionotropic acetylcholine receptor complexes regulate inhibitory motor neuron activity in *Caenorhabditis elegans*. *J. Neurosci.* **33**, (2013).
3. Towers, P. R., Edwards, B., Richmond, J. E. & Sattelle, D. B. The *Caenorhabditis elegans* lev-8 gene encodes a novel type of nicotinic acetylcholine receptor  $\alpha$  subunit. *J. Neurochem.* **93**, (2005).
4. Touroutine, D. *et al.* acr-16 encodes an essential subunit of the levamisole-resistant nicotinic receptor at the *Caenorhabditis elegans* neuromuscular junction. *J. Biol. Chem.* **280**, (2005).
5. McKay, J. P., Raizen, D. M., Gottschalk, A., Schafer, W. R. & Avery, L. eat-2 and eat-18 are Required for Nicotinic Neurotransmission in the *Caenorhabditis elegans* Pharynx. *Genetics* **166**, (2004).
6. Fleming, J. T. *et al.* *Caenorhabditis elegans* levamisole resistance genes lev-1, unc-29, and unc-38 encode functional nicotinic acetylcholine receptor subunits. *J. Neurosci.* **17**, (1997).
7. Culetto, E. *et al.* The *Caenorhabditis elegans* unc-63 gene encodes a levamisole-sensitive nicotinic acetylcholine receptor  $\alpha$  subunit. *J. Biol. Chem.* **279**, (2004).
8. Bamber, B. A., Beg, A. A., Twyman, R. E. & Jorgensen, E. M. The *Caenorhabditis elegans* unc-49 locus encodes multiple subunits of a heteromultimeric GABA receptor. *J. Neurosci.* **19**, (1999).

9. Beg, A. A. & Jorgensen, E. M. EXP-1 is an excitatory GABA-gated cation channel. *Nat. Neurosci.* **6**, (2003).
10. Jobson, M. A. *et al.* Spillover transmission is mediated by the excitatory GABA receptor LGC-35 in *C. elegans*. *J. Neurosci.* (2015) doi:10.1523/JNEUROSCI.4557-14.2015.
11. Keane, J. & Avery, L. Mechanosensory inputs influence *Caenorhabditis elegans* pharyngeal activity via ivermectin sensitivity genes. *Genetics* **164**, (2003).
12. Dent, J. A., Smith, M. M., Vassilatis, D. K. & Avery, L. The genetics of ivermectin resistance in *Caenorhabditis elegans*. *Proc. Natl. Acad. Sci. U. S. A.* **97**, (2000).
13. Cully, D. F. *et al.* Cloning of an avermectin-sensitive glutamate-gated chloride channel from *Caenorhabditis elegans*. *Nature* (1994) doi:10.1038/371707a0.
14. Horoszok, L., Raymond, V., Sattelle, D. B. & Wolstenholme, A. J. GLC-3: A novel fipronil and BIDN-sensitive, but picrotoxinin-insensitive, L-glutamate-gated chloride channel subunit from *Caenorhabditis elegans*. *Br. J. Pharmacol.* **132**, (2001).
15. Putrenko, I., Zakikhani, M. & Dent, J. A. A family of acetylcholine-gated chloride channel subunits in *Caenorhabditis elegans*. *J. Biol. Chem.* **280**, (2005).
16. Takayanagi-Kiya, S., Zhou, K. & Jin, Y. Release-dependent feedback inhibition by a presynaptically localized ligand-gated anion channel. *Elife* (2016) doi:10.7554/eLife.21734.
17. Feng, X. P., Hayashi, J., Beech, R. N. & Prichard, R. K. Study of the nematode putative GABA type-A receptor subunits: Evidence for modulation by ivermectin. *J. Neurochem.* **83**, (2002).
18. Brockie, P. J., Mellem, J. E., Hills, T., Madsen, D. M. & Maricq, A. V. The *C. elegans* glutamate receptor subunit NMR-1 is required for slow NMDA-activated currents that regulate reversal frequency during locomotion. *Neuron* **31**, (2001).
19. Kano, T. *et al.* Memory in *Caenorhabditis elegans* Is Mediated by NMDA-Type Ionotropic Glutamate Receptors. *Curr. Biol.* **18**, (2008).
20. Rose, J. K., Kaun, K. R., Chen, S. H. & Rankin, C. H. GLR-1, a Non-NMDA Glutamate Receptor Homolog, Is Critical for Long-Term Memory in *Caenorhabditis elegans*. *J. Neurosci.* **23**, (2003).
21. Zou, W. *et al.* Decoding the intensity of sensory input by two glutamate receptors in one *C. elegans* interneuron. *Nat. Commun.* **9**, (2018).

Table 2

| Strain No. | Description                                              |
|------------|----------------------------------------------------------|
| AQ4728     | him-5; lJEx1388[plgc-57::lgc-57::SL2GFP; punc-122::RFP]  |
| PHX3594    | lgc-40(syb3594)                                          |
| PHX3536    | lgc-57(syb3536)                                          |
| PHX3562    | lgc-58(syb3562)                                          |
| AQ4614     | lJEx1332[plgc-39(2kb)::lgc-39::SL2 GFP; punc-122::RFP]   |
| AQ4427     | lJEx1254[plgc-40(2kb)::mKate2::gpd-23'UTR; unc-122::gfp] |
| AQ4423     | lJEx1252[plgc-57(2kb)::mKate2::gpd-23'UTR; unc-122::gfp] |
| AQ4377     | lJEx1242[plgc-39(2kb)::mKate2::gpd-23'UTR; unc-122::gfp] |
| AQ4428     | lJEx1255[plgc-58(2kb)::mKate2::gpd-23'UTR; unc-122::gfp] |
| AQ5072     | lJEx1562[plgc-46::GFP::gpd-2UTR; punc-122::RFP]          |
| OH15262    | "NeuroPAL" otEx7057                                      |

|        |                                                                              |
|--------|------------------------------------------------------------------------------|
| AQ4657 | lgc-39(lj121)                                                                |
| AQ4850 | NeuroPal(otEx7057); lJEx1453 [plgc-33::lgc-33::SL2 GFP; punc-122::RFP]       |
| AQ4837 | NeuroPal(otEx7057); lJEx1449 [plgc-34::lgc-34::SL2 GFP;unc-122::RFP]         |
| AQ4529 | him-5(e1490); lJEx1299[plgc-48::gDNA lgc-48 3'UTR::SL2 mKate2;punc-122::GFP] |
| AQ4928 | lJEx1498 [plgc-47(2kb)::lgc-47::SL2 GFP; unc-122::RFP]                       |
| AQ4849 | NeuroPal(otEx7057); lJEx1453 [plgc-49::lgc-49::SL2 GFP; unc-122::RFP]        |

Note:

*lgc-57* previously called *ggr-1*

*lgc-58* previously called *ggr-2*

## Figures

Figure S1

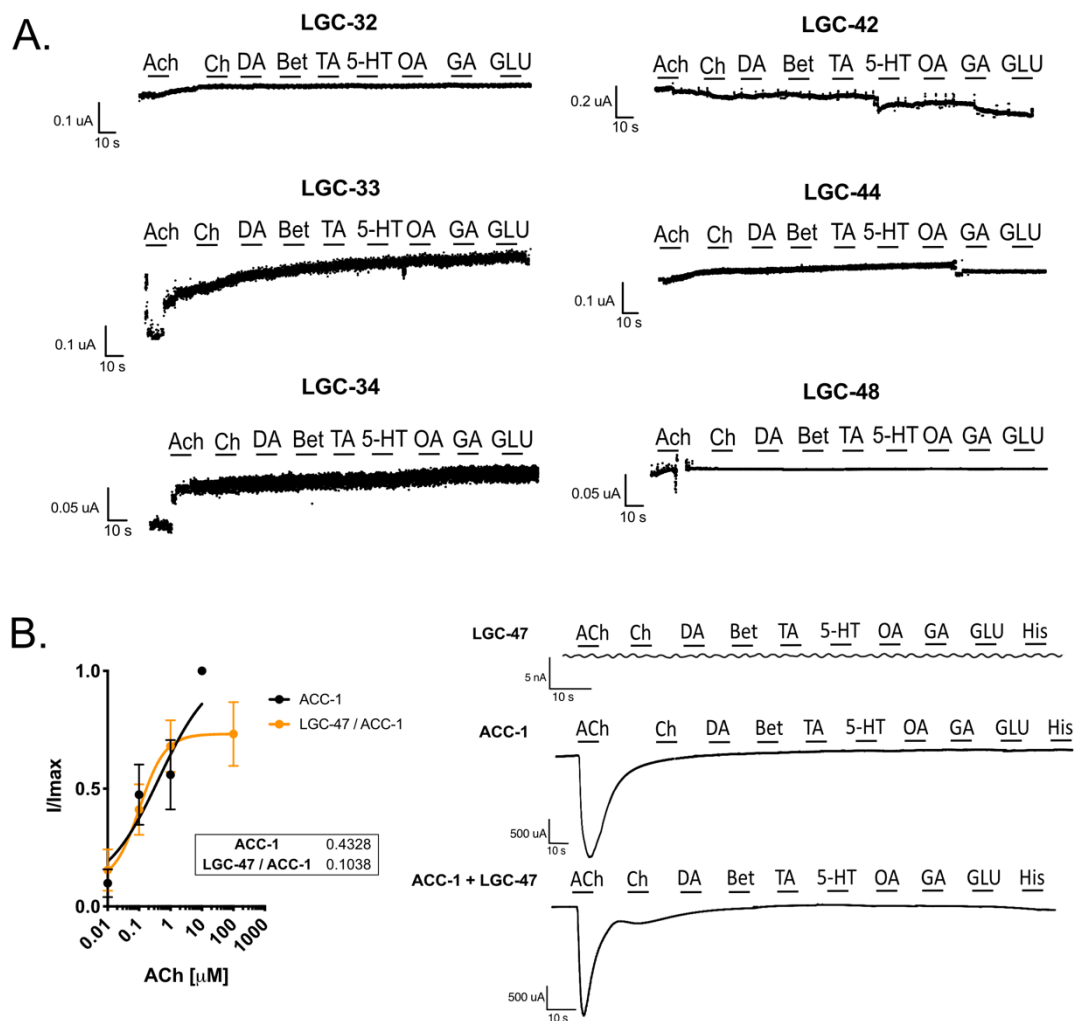

Figure S2

A.

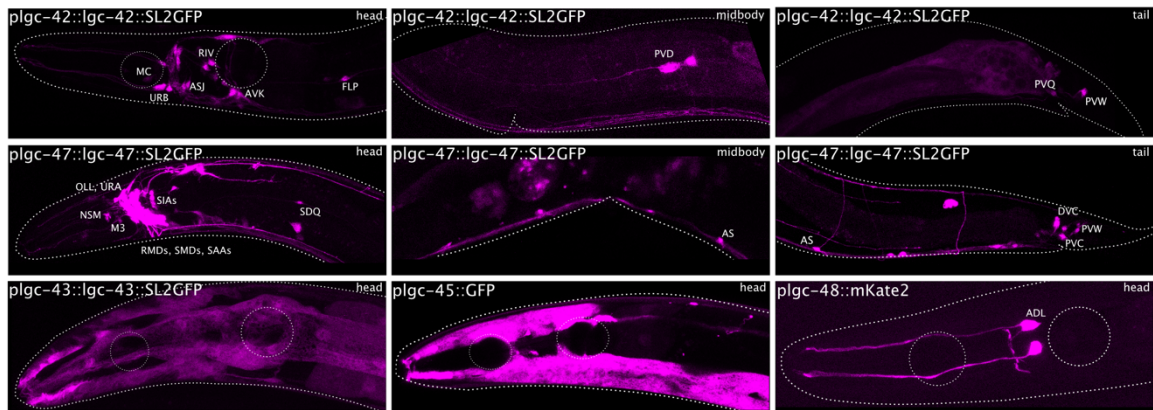

B.

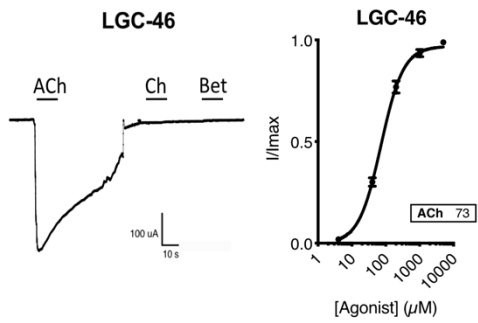

C.

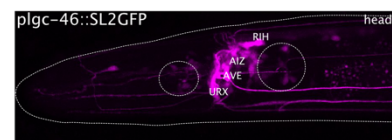





Figure S5

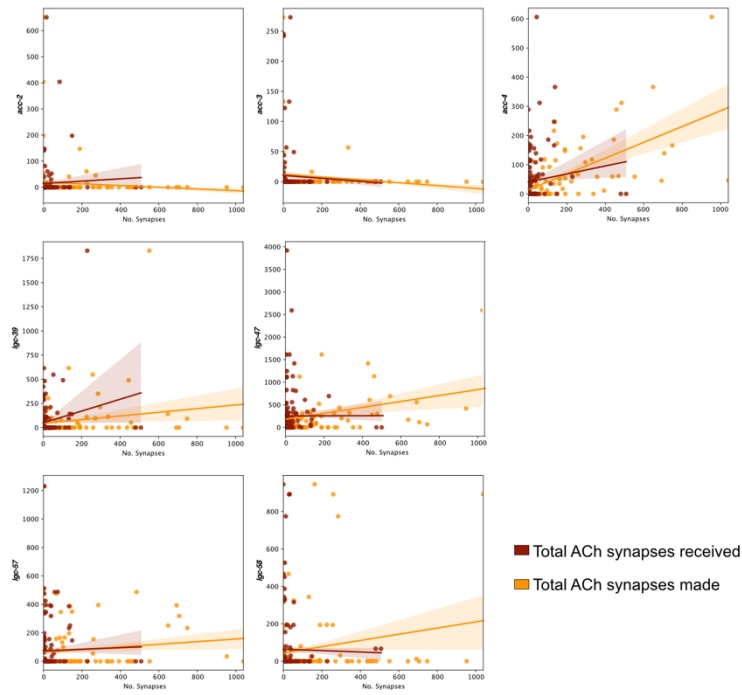

Figure S6

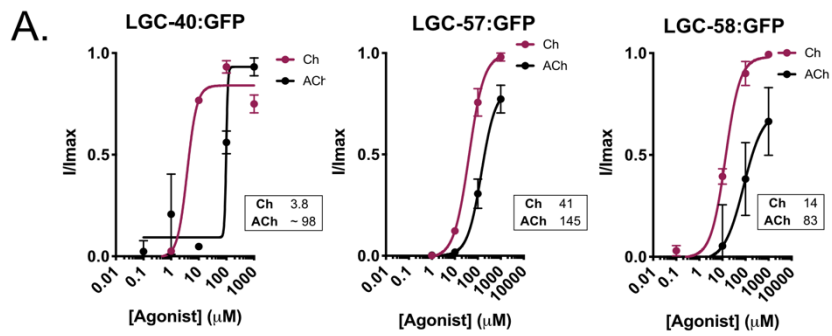

Supplement: Supplementary file [file media-1.pdf]
